# Supplementary material
Source: PubMed Central journal article supplement (PMC3320999)
Supplement: supp_M111.264382_jbc.M111.264382-1.pdf [file supp_M111.264382_jbc.M111.264382-1.pdf]

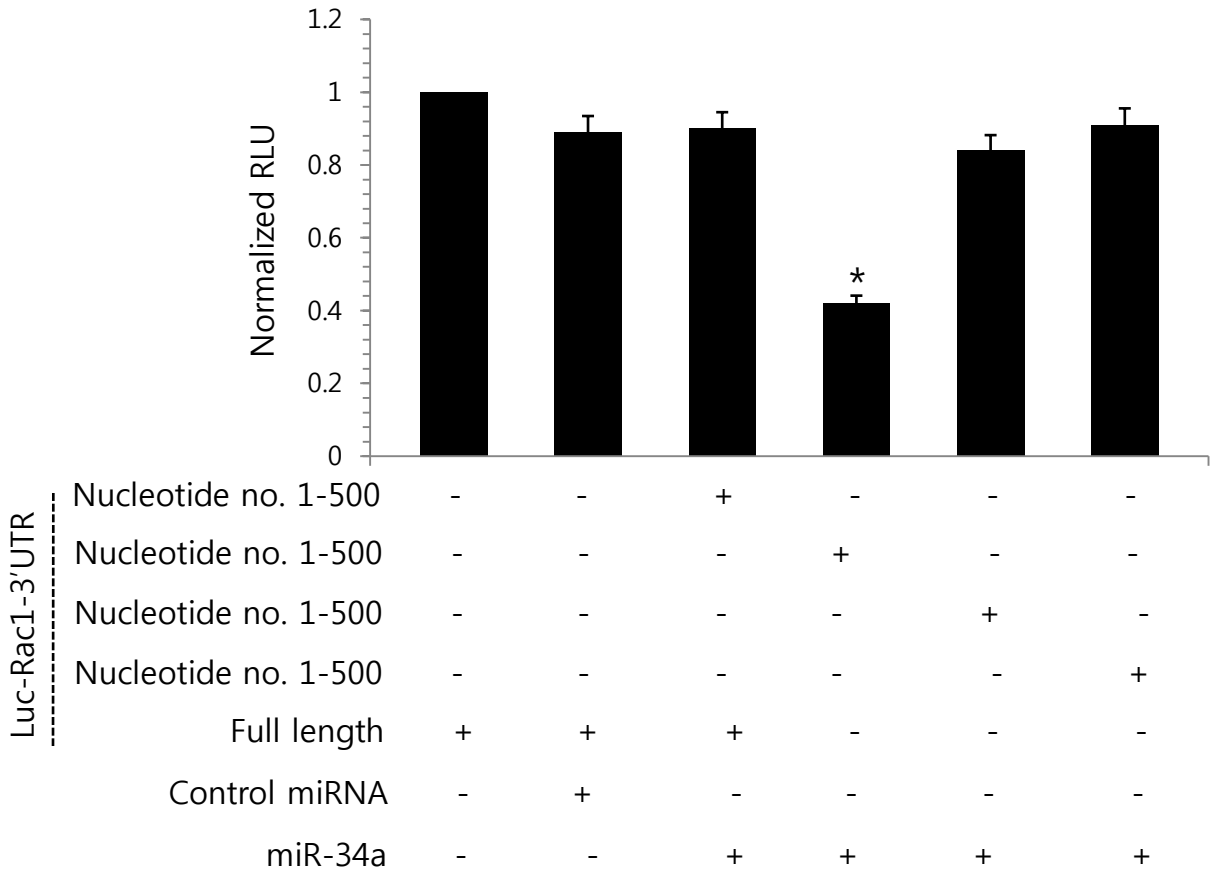

Supplementary 2

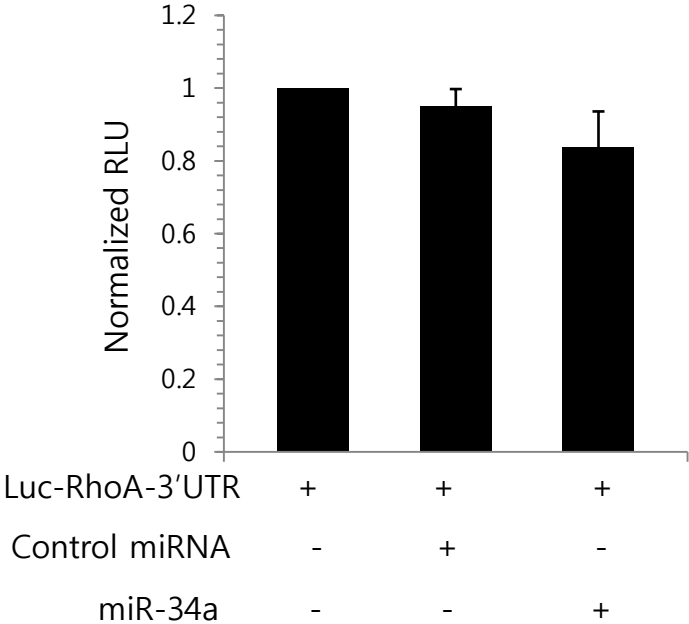

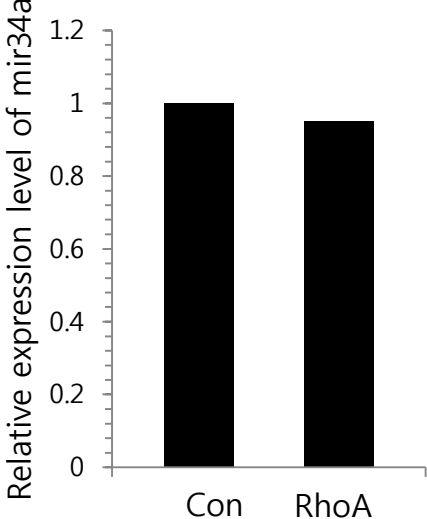

Table 1. Differentially expressed miRNAs at 48 hr after suppression of JNK signaling in limb mesenchymal cells

| miRNA          | Fold change | human sequence                                     | Chicken sequence        |
|----------------|-------------|----------------------------------------------------|-------------------------|
| Up-regulated   |             |                                                    |                         |
| miR-34a        | 2.35        | UGGCAGUGUCUUAGCUGGUUGU                             | UGGCAGUGUCUUAGCUGGUUGU  |
| miR-125a-3p    | 2.1         | UCCCUGAGACCCUUUAACCUGUGA                           |                         |
| miR-136        | 1.68        | ACUCCAUUUUGUUUUGAUGAUGGA<br>CAUCAUCGUCUCAAAUGAGUCU |                         |
| miR-142-3p     | 1.89        | UGUAGUGUUUCCUACUUUAUGGA                            | UGUAGUGUUUCCUACUUUAUGG  |
| miR-146a       | 1.95        | UGAGAACUGAAUCCAUGGGUU                              | UGAGAACUGAAUCCAUGGGUU   |
| miR-193a-5p    | 2.12        | UGGGUCUUUGCGGGCGAGAUGA                             |                         |
| miR-193b-5p    |             | CGGGUUUUUGAGGGCGAGAUGA                             |                         |
| miR-221        | 1.56        | AGCUACAUUGUCUGCUGGGUUUC                            | AGCUACAUUGUCUGCUGGGUUUC |
| miR-373        | 2.35        | ACUCAAUUGGGGGCGCUUCC<br>GAAGUGCUCGAAUUUGGGGUGU     |                         |
| miR-375        | 2.86        | UUUGUUCGUUCGGCUCGCGUGA                             | UUUGUUCGUUCGGCUCGCGUUA  |
| miR-491-3p     | 2.62        | CUUAUGCAAGAUUCCCUUCUAC                             |                         |
| miR-518a-2-3p  | 1.59        | GAAAGCGCUUCCCUUUGCUGGA                             |                         |
| miR-671-3p     | 1.97        | UCCGGUUCUCAGGGCUCACC                               |                         |
| miR-768-3p     | 1.52        | Dead miR entry                                     |                         |
| miR-873        | 1.26        | GCAGGAACUUGUGAGUCUCCU<br>GGAGACUGAUGAGUCCCGGA      |                         |
| Down-regulated |             |                                                    |                         |
| miR-15b        | -2.36       | UAGCAGCACAUCAUGGUUACA                              | UAGCAGCACAUCAUGGUUUGCA  |
| miR-124-1      | -2.56       | CGUGUUCACAGCGACCUUGAU<br>UAAGGCACGCGGUGAAUGCC      |                         |
| miR-140        | -3.51       | CAGUGGUUUUACCCUAUGGUAG                             | AGUGGUUUUACCCUAUGGUAG   |
| miR-136        | -2.36       | ACUCCAUUUUGUUUUGAUGAUGGA<br>CAUCAUCGUCUCAAAUGAGUCU |                         |
| miR-199b       | -2.68       | ACAGUAGUCUGCACAUUGGUUA                             | CAGUAGUCUGCACAUUGGU     |
| miR-370        | -3.15       | GCCUGCUGGGGUGGAACCUGGU                             |                         |
| miR-488        | -3.45       | CCCAGAUAAUGGCACUCUCAA<br>UUGAAAGGCUAUUUUCUUGGUC    |                         |
| miR-551b       | -2.55       | GCGACCAUACUUGGUUUCAG                               | GCGACCAUACUUGGUUUCAG    |
| miR-566        | -1.59       | GGGCGCCUGUGAUCCCAAC                                |                         |
| miR-571        | -2.35       | UGAGUUGGCCAUCUGAGUGAG                              |                         |
| miR-622        | -2.15       | ACAGUCUGCUGAGGUUGGAGC                              |                         |
| miR-632        | -1.99       | GUGUCUGCUUCCUGUGGA                                 |                         |
